# Supplementary material
Source: PubMed Central journal article supplement (PMC3703656)
Supplement: NIHMS349621-supplement-2.pdf [file NIHMS349621-supplement-2.pdf]

## Supplementary Table 1

Primers for pFUIGW-Twist construction and real-time PCR

|               | Forward Primers (5'-3')                 | Reverse Primers (5'-3')               |
|---------------|-----------------------------------------|---------------------------------------|
| pFUIGW-Twist1 | <u>cgggatcc</u> ATGATGCAGGACGTGTCCAGCTC | <u>ggaattc</u> CTAGTGGGACGCGGACATGGAC |
| Twist-1       | ggcatcactatggactttctctatt               | ggccagttgatcccagtatt                  |
| Vimentin      | gttcccctaaaccgctagg                     | agcgagagtggcagagga                    |
| Slug          | tggttgcttcaaggacacat                    | gttgcagtgagggcaagaa                   |
| Foxc2         | ggggacctgaaccacctc                      | aacatctcccgcacgttg                    |
| TGFbeta3      | aagaagcgggctttggac                      | cgcacacagcagttctcc                    |
| KRT19         | gccactactacagaccatcc                    | caaacttggtcgaagtcac                   |
| KRT7          | ctgaggctgaagcctggta                     | gggtattccggaggtcgt                    |
| GAPDH         | ctctgctcctctgttcgac                     | acgaccaaaccggtgactc                   |

Supplemental Table 2. Genes expression profile of EMT array

|                                                         |                                                                                                                                                                          |
|---------------------------------------------------------|--------------------------------------------------------------------------------------------------------------------------------------------------------------------------|
| Genes Up-regulated during EMT                           | <i>CALD1, COL1A2, COL3A1, COL5A2, FOCX2, GSC, MMP2, MMP9, SNAI2, SNAI3, SOX10, SPARC, TCF4, TIMP1, TWIST1, VIM</i>                                                       |
| Genes Down-regulated during EMT                         | <i>CAV2, DSP, FGFBP1, KRT19, MITF, MST1R, NUDT13, PPPDE2, TFPI2, TSPAN13</i>                                                                                             |
| Genes related with Differentiation & Development        | <i>AKT1, DSP, F11R, JAG1, MITF, MST1R, NOTCH1, SMAD2, BMP7, COL3A1, COL5A2, CTNNB1, ERBB3, FOXC2, FZD7, GSC, KRT14, NODAL, SNAI2, SOX10, TGFB2, TGFB3, TWIST1, WNT11</i> |
| Genes related with Migration & Motility                 | <i>CAV2, EGFR, ITGB1, JAG1, MST1R, RAC1, STAT3, CALD1, NODAL, PDGFRB, TGFB1, VIM</i>                                                                                     |
| Genes related with Extracellular Matrix & Cell adhesion | <i>DSC2, EGFR, F11R, ILK, ITGB1, PTK2, RAC1, BMP7, COL1A2, COL3A1, COL5A2, CTNNB1, ERBB3, FOXC2, MMP2, MMP9, TGFB1, TGFB2, TIMP1</i>                                     |
